# Supplementary material for: A Transformative Technology Linking Patient’s mRNA Expression Profile to Anticancer Drug Efficacy
Source: Preprints.org preprint supplement (doi:10.20944/preprints202406.0085.v1), 2024-06-06
Supplement: Supplementary file 1 [file supplementary]

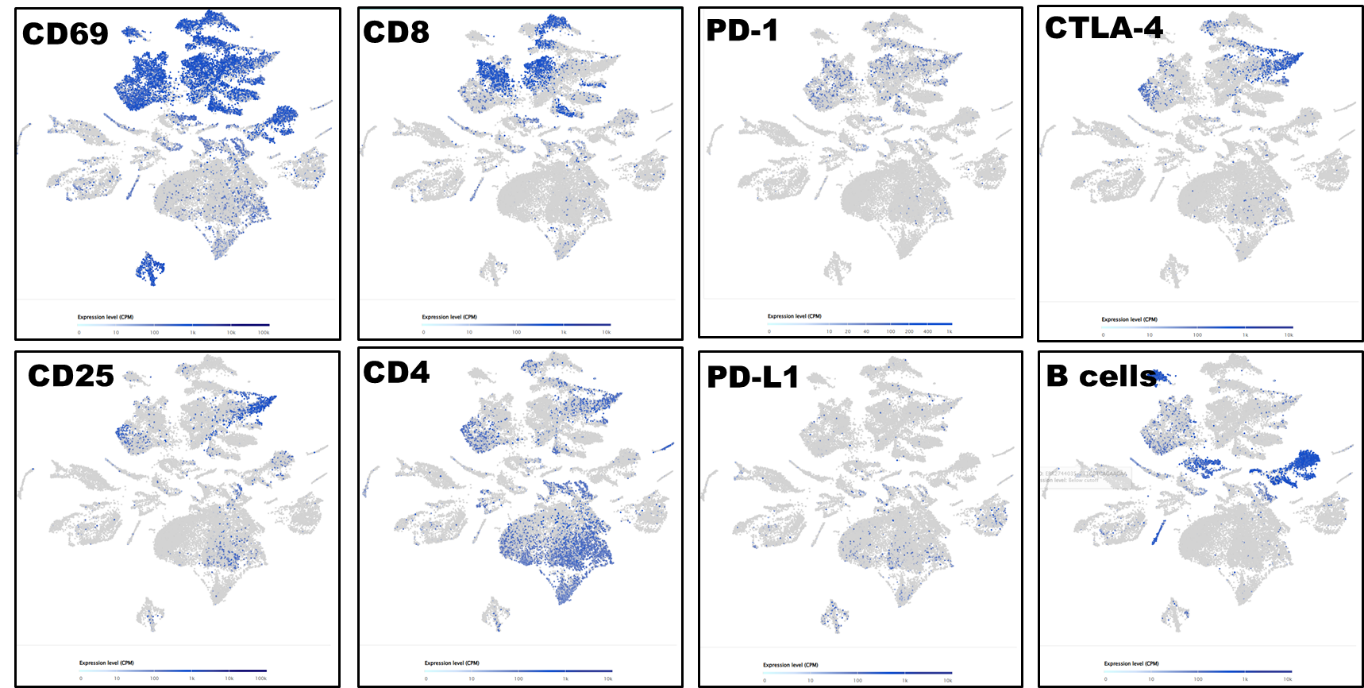


**Figure S1.** Distinct immune cell clusters in tumor microenvironment by single cell RNA-Seq spatial transcriptomic analysis in lung carcinoma tissues (32,341 cells).
